# Supplementary material
Source: publisher figshare collection journal article supplement (https://tandf.figshare.com/ndownloader/files/14658929)
Supplement: Supplementary file 1 [file 14658929]

| **Supplementary Table 1.** Influenza-attributable respiratory, cardiovascular, and all-cause mortality and mortality rates in Mexico between epidemiological week 27 of 1998 and epidemiological week 26 of 2015 | | | | | | |
| --- | --- | --- | --- | --- | --- | --- |
| Season | Respiratory influenza-associated mortality | Respiratory influenza-associated mortality rate | Cardiovascular influenza-associated mortality | Cardiovascular influenza-associated mortality rate | All-cause influenza-associated mortality | All-cause influenza-associated mortality rate |
| Average for 1998-2004 seasons | 5,828 | 5.73 | 6,894 | 6.77 | 21,115 | 20.72 |
| Average for 2004-2009 seasons | 4,225 | 3.86 | 4,889 | 4.5 | 16,668 | 15.26 |
| Pandemic | 8,843 | 7.8 | 10,200 | 9 | 34,771 | 30.6 |
| Average for 2010-2015 seasons | 5,792 | 4.65 | 8,185 | 6.92 | 23,887 | 20.32 |
|  | | | | | | |

| **Supplementary Table 2.** Influenza-attributable respiratory mortality and mortality rates in Mexico between epidemiological week 27 of 1998 and epidemiological week 26 of 2015, according to age group | | | | | | | | |
| --- | --- | --- | --- | --- | --- | --- | --- | --- |
| Season | Mortality in 0-<5 years | Mortality rate in0-<5 years | Mortality in 5-19 years | Mortality rate in 5-19 years | Mortality in 20-59 years | Mortality rate in 20-59 years | Mortality 60 years and older | Mortality rate in 60 years and older |
| Average for 1998-2004 seasons | 1,219 | 10.5 | 63 | 0.2 | 449 | 0.9 | 4,118 | 53.1 |
| Average for 2004-2009 seasons | 684 | 6.1 | 38 | 0.1 | 313 | 0.6 | 3,334 | 36.6 |
| Pandemic | 765 | 6.8 | 309 | 0.9 | 3,535 | 6 | 4,349 | 43.3 |
| Average for 2010-2015 seasons | 394 | 3.5 | 42 | 0.1 | 923 | 1.5 | 4,236 | 38.2 |
